# Supplementary material for: Gallic acid-functionalized graphene hydrogel as adsorbent for removal of chromium (iii) and organic dye pollutants from tannery wastewater
Source: PubMed Central journal article supplement — RSC Adv. 2019 Aug 29;9(46):27060–8. doi: 10.1039/c9ra05664e (PMC9070501; doi:10.1039/c9ra05664e), 2019-08-29
Supplement: RA-009-C9RA05664E-s001.pdf [file RA-009-C9RA05664E-s001.pdf]

# Gallic Acid-functionalized Graphene Hydrogel as Adsorbent for Removal of Chromium (III) and Organic Dye Pollutants from Tannery Wastewater

*Gongyan Liu,<sup>ab</sup> Ruiquan Yu,<sup>ab</sup> Tianxiang Lan,<sup>b</sup> Zheng Liu,<sup>c</sup> Peng Zhang<sup>d</sup> and Ruifeng  
Liang,<sup>\*d</sup>*

<sup>a</sup> National Engineering Laboratory for Clean Technology of Leather Manufacture,  
Sichuan University, Chengdu 610065, China.

<sup>b</sup> The Key Laboratory of Leather Chemistry and Engineering of Ministry of  
Education, Sichuan University, Chengdu 610065, China

<sup>c</sup> Jiangsu Province Special Equipment Safety Supervision and Inspection Institute,  
Wuxi 214717, China

<sup>d</sup> The State Key Laboratory of Hydraulic and Mountain River Engineering, Sichuan  
University, Chengdu 610065, China

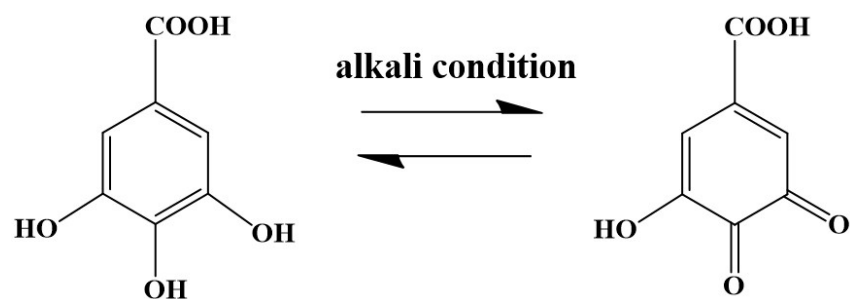

**Fig. S1** Transformation of GA under alkali condition.

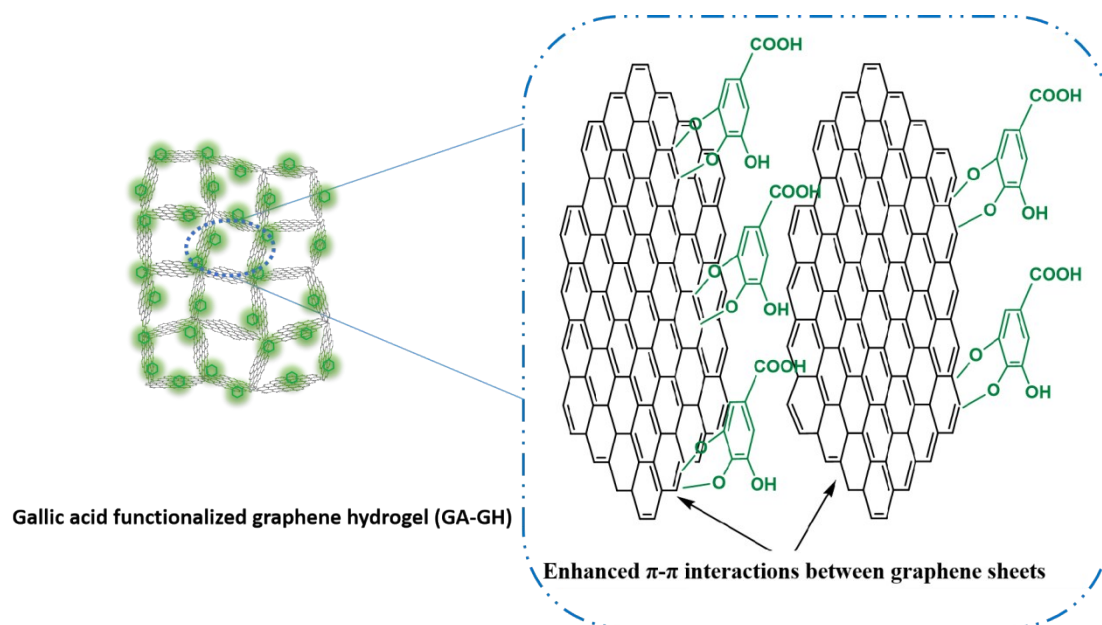

**Scheme S1.** Schematic illustration of the formation process of gallic acid functionalized graphene hydrogel (GA-GH).

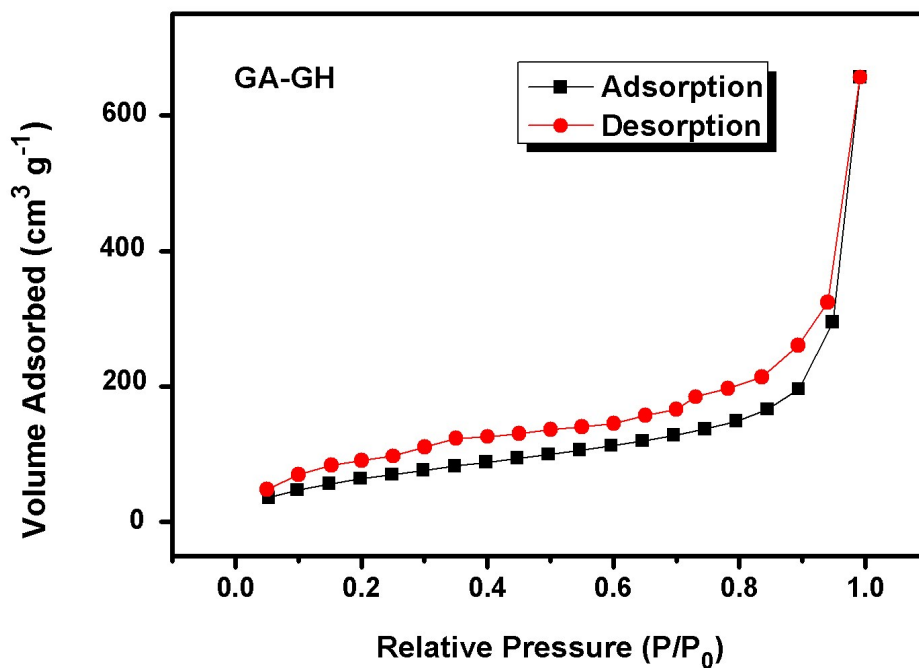

Fig. S2 Nitrogen gas adsorption and desorption isotherms of GA-GH.

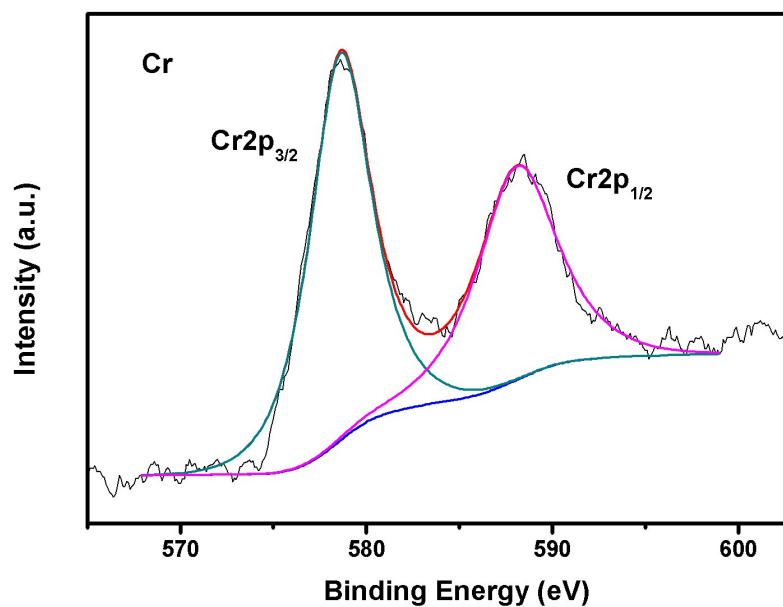

Fig. S3 High-resolution XPS of Cr peaks of GA-GH after adsorption for Cr(III).
